# Supplementary material
Source: Springer Nature journal article supplement (https://www.springerprofessional.de/resource/supplementary/40537_2013_7_MOESM1_ESM.pdf/10796332)
Supplement: MOESM1 [file 10796332]

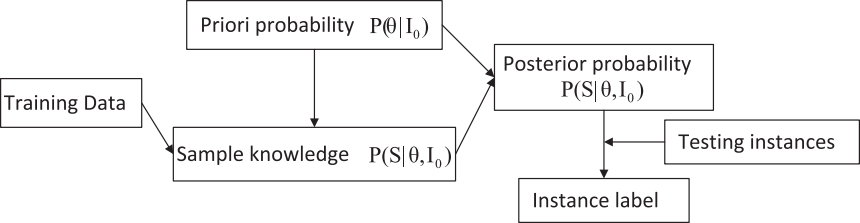

Priori probability  $P(\theta|I_0)$

Training Data

Sample knowledge  $P(S|\theta, I_0)$

Posterior probability  $P(S|\theta, I_0)$

Testing instances

Instance label
